# Supplementary material for: Venetoclax Initiation in Chronic Lymphocytic Leukemia: International Insights and Innovative Approaches for Optimal Patient Care
Source: MDPI journal article supplement (doi:10.3390/cancers16050980), 2024-02-28
Supplement: s1 [file s1]

**Supplementary Figure S1.**

|                             | DAY 1                                                                                                        | DAY 2                                                                                                       | DAY 3                                                                               | DAY 4                                                                               | DAY 5                                                                                 | DAY 6                                                                                 | DAY 7                                                                                                                 |
|-----------------------------|--------------------------------------------------------------------------------------------------------------|-------------------------------------------------------------------------------------------------------------|-------------------------------------------------------------------------------------|-------------------------------------------------------------------------------------|---------------------------------------------------------------------------------------|---------------------------------------------------------------------------------------|-----------------------------------------------------------------------------------------------------------------------|
| <b>Week 1</b><br>20 mg/day  | 10 mg x 2                                                                                                    | 10 mg x 2                                                                                                   | 10 mg x 2                                                                           | 10 mg x 2                                                                           | 10 mg x 2                                                                             | 10 mg x 2                                                                             | 10 mg x 2                                                                                                             |
|                             | <br>6-8 hour post-dose labs | <br>24 hour post-dose labs |    |    |    |    | <br>Pre-dose before next dose labs |
| <b>Week 2</b><br>50 mg/day  | 50 mg                                                                                                        | 50 mg                                                                                                       | 50 mg                                                                               | 50 mg                                                                               | 50 mg                                                                                 | 50 mg                                                                                 | 50 mg                                                                                                                 |
|                             | <br>6-8 hour post-dose labs | <br>24 hour post-dose labs |    |    |    |    | <br>Pre-dose before next dose labs |
| <b>Week 3</b><br>100 mg/day | 100 mg                                                                                                       | 100 mg                                                                                                      | 100 mg                                                                              | 100 mg                                                                              | 100 mg                                                                                | 100 mg                                                                                | 100 mg                                                                                                                |
|                             |                             |                            |    |    |    |    | <br>Pre-dose before next dose labs |
| <b>Week 4</b><br>200 mg/day | 100 mg x 2                                                                                                   | 100 mg x 2                                                                                                  | 100 mg x 2                                                                          | 100 mg x 2                                                                          | 100 mg x 2                                                                            | 100 mg x 2                                                                            | 100 mg x 2                                                                                                            |
|                             |                             |                            |    |    |    |    | <br>Pre-dose before next dose labs |
| <b>Week 5</b><br>400 mg/day | 100 mg x 4                                                                                                   | 100 mg x 4                                                                                                  | 100 mg x 4                                                                          | 100 mg x 4                                                                          | 100 mg x 4                                                                            | 100 mg x 4                                                                            | 100 mg x 4                                                                                                            |
|                             |                           |                          |  |  |  |  |                                  |

**Supplementary Figure S1.** Venetoclax ramp-up daily dosing and blood chemistry monitoring schedule<sup>a</sup> [34] <sup>a</sup>Potassium, calcium, creatinine, phosphorus, uric acid (review in real time, evaluate and manage promptly).
